# Supplementary material for: Stable carbamate pathway towards organic–inorganic hybrid perovskites and aromatic imines
Source: Royal Society of Chemistry journal article supplement (doi:10.1039/d0ra07814j), 2020-01-01
Supplement: d0ra07814j1.pdf [file d0ra07814j1.pdf]

## Supporting Information

### Solid carbamate pathway towards organic-inorganic hybrid perovskites and aromatic imines

Kyu Hyung Lee,<sup>a</sup> Sun Joo Kim,<sup>a</sup> Hee Sun Park,<sup>a</sup> Byung Wook Lim,<sup>a</sup> Byeongno Lee,<sup>a</sup> Young  
Jun Park,<sup>b</sup> Wonwoo Nam,<sup>b</sup> Nam Hwi Hur<sup>a,\*</sup>

<sup>a</sup> Department of Chemistry, Sogang University, Seoul 04107, Korea

<sup>b</sup> Department of Bioinspired Science, Department of Chemistry and Nano Science, Ewha  
Womans University, Seoul 03760, Korea

\*E-mail: [nhhur@sogang.ac.kr](mailto:nhhur@sogang.ac.kr)

**X-ray crystallography.** A single crystal of methyl ammonium methyl carbamate (MAC) was selected by a nylon loop (Hampton Research Co.) placed on a handmade cooper plate, which was placed inside a liquid N<sub>2</sub> Dewar vessel at approximately -40 °C and was mounted on a goniometer head in a N<sub>2</sub> cryostream. Data collections were carried out in a Bruker SMART AXS diffractometer equipped with a monochromator with a Mo K $\alpha$  ( $\lambda = 0.71073$  Å) incident beam. The charge-coupled device (CCD) data were integrated and scaled using the Bruker-S SAINT software package, and the structure was solved and refined using SHEXTL V 6.12.<sup>1</sup> Hydrogen atoms were located in the calculated

positions. The crystal data for MAC: C<sub>3</sub>H<sub>10</sub>N<sub>2</sub>O<sub>2</sub>, Orthorhombic, *Pna2*<sub>1</sub>, *Z* = 4, *a* = 9.3493(2), *b* = 6.9787(1), *c* = 9.1550(2) Å,  $\alpha=\beta=\gamma$  90°, *V* = 597.33(2) Å<sup>3</sup>,  $\mu$  = 0.097 mm<sup>-1</sup>,  $\rho_{\text{calcd}}$  = 1.180 g/cm<sup>3</sup>, *R*<sub>1</sub> = 0.0243, and *wR*<sub>2</sub> = 0.0589 for 1,444 unique reflections and 104 variables. The crystallographic data for MAC are listed in Table S1, and Table S2 lists the selected bond distances and angles. CCDC-2023499 for MAC contains the supplementary crystallographic data for this paper. These data can be obtained free of charge via [www.ccdc.cam.ac.uk/data\\_request/cif](http://www.ccdc.cam.ac.uk/data_request/cif) (or from the Cambridge Crystallographic Data Centre, 12, Union Road, Cambridge CB2 1EZ, UK; fax: (+44) 1223-336-033; or [deposit@ccdc.cam.ac.uk](mailto:deposit@ccdc.cam.ac.uk)).

**Table S1.** Crystal data for methyl ammonium methyl carbamate (CH<sub>3</sub>NH<sub>3</sub><sup>+</sup>CH<sub>3</sub>NHCO<sub>2</sub><sup>-</sup>).

|                                            |                                                              |
|--------------------------------------------|--------------------------------------------------------------|
| Empirical formula                          | C <sub>3</sub> H <sub>10</sub> N <sub>2</sub> O <sub>2</sub> |
| Formula weight                             | 106.13                                                       |
| Temperature (K)                            | 100(2)                                                       |
| Wavelength (Å)                             | 0.71073                                                      |
| Crystal system/space group                 | Orthorhombic, <i>Pna2</i> <sub>1</sub>                       |
| Unit cell dimensions                       |                                                              |
| <i>a</i> (Å)                               | 9.3493(2)                                                    |
| <i>b</i> (Å)                               | 6.9787(1)                                                    |
| <i>c</i> (Å)                               | 9.1550(2)                                                    |
| $\alpha$ (°)                               | 90                                                           |
| $\beta$ (°)                                | 90                                                           |
| $\gamma$ (°)                               | 90                                                           |
| Volume (Å <sup>3</sup> )                   | 597.33(2)                                                    |
| <i>Z</i>                                   | 4                                                            |
| Calculated density (g/cm <sup>-3</sup> )   | 1.180                                                        |
| Absorption coefficient (mm <sup>-1</sup> ) | 0.097                                                        |
| Reflections collected                      | 12394                                                        |
| Independent reflections [ <i>R</i> (int)]  | 1436 [0.0243]                                                |
| Refinement method                          | Full-matrix<br>least-squares on <i>F</i> <sup>2</sup>        |
| Data/restraints/parameters                 | 1436/1/104                                                   |
| Goodness-of-fit on <i>F</i> <sup>2</sup>   | 1.190                                                        |

**Table S2.** Selected bond distances (Å) and bond angles (°) for methyl ammonium methyl carbamate ( $\text{CH}_3\text{NH}_3^+\text{CH}_3\text{NHCO}_2^-$ ).

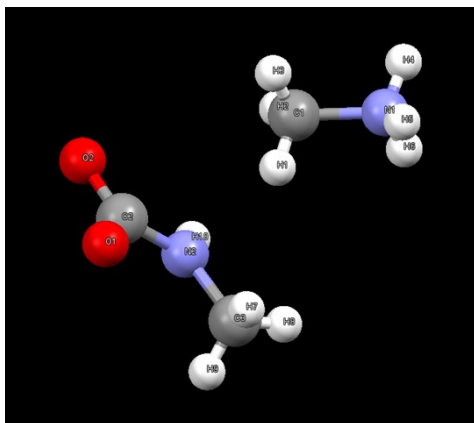

| Number | Object1 | Object2 | Length    |
|--------|---------|---------|-----------|
| 1      | N1      | H5      | 0.91(1)   |
| 2      | N1      | H4      | 0.91(1)   |
| 3      | N1      | H6      | 0.84(1)   |
| 4      | N1      | C1      | 1.479(1)  |
| 5      | C1      | H3      | 0.93(2)   |
| 6      | C1      | H2      | 0.98(2)   |
| 7      | C1      | H1      | 0.94(1)   |
| 8      | C3      | H8      | 0.89(2)   |
| 9      | C3      | H7      | 0.98(2)   |
| 10     | C3      | H9      | 0.95(1)   |
| 11     | C3      | N2      | 1.452(1)  |
| 12     | N2      | H10     | 0.83(1)   |
| 13     | N2      | C2      | 1.3592(9) |
| 14     | C2      | O2      | 1.2787(9) |
| 15     | C2      | O1      | 1.2694(8) |

| Number | Atom1 | Atom2 | Atom3 | Angle    |
|--------|-------|-------|-------|----------|
| 1      | C1    | N1    | H4    | 110.4(8) |
| 2      | C1    | N1    | H5    | 109.4(7) |
| 3      | C1    | N1    | H6    | 109.2(8) |
| 4      | H4    | N1    | H5    | 109(1)   |

|    |    |    |     |           |
|----|----|----|-----|-----------|
| 5  | H4 | N1 | H6  | 109(1)    |
| 6  | H5 | N1 | H6  | 110(1)    |
| 7  | N1 | C1 | H2  | 107.8(9)  |
| 8  | N1 | C1 | H3  | 109(1)    |
| 9  | N1 | C1 | H1  | 107.5(8)  |
| 10 | H2 | C1 | H3  | 111(1)    |
| 11 | H2 | C1 | H1  | 109(1)    |
| 12 | H3 | C1 | H1  | 112(1)    |
| 13 | C3 | N2 | C2  | 122.93(6) |
| 14 | C3 | N2 | H10 | 119.3(8)  |
| 15 | C2 | N2 | H10 | 117.4(8)  |
| 16 | N2 | C3 | H9  | 111.7(7)  |
| 17 | N2 | C3 | H8  | 112(1)    |
| 18 | N2 | C3 | H7  | 109(1)    |
| 19 | H9 | C3 | H8  | 110(1)    |
| 20 | H9 | C3 | H7  | 109(1)    |
| 21 | H8 | C3 | H7  | 105(2)    |
| 22 | N2 | C2 | O2  | 117.53(6) |
| 23 | N2 | C2 | O1  | 119.47(6) |
| 24 | O2 | C2 | O1  | 122.99(6) |

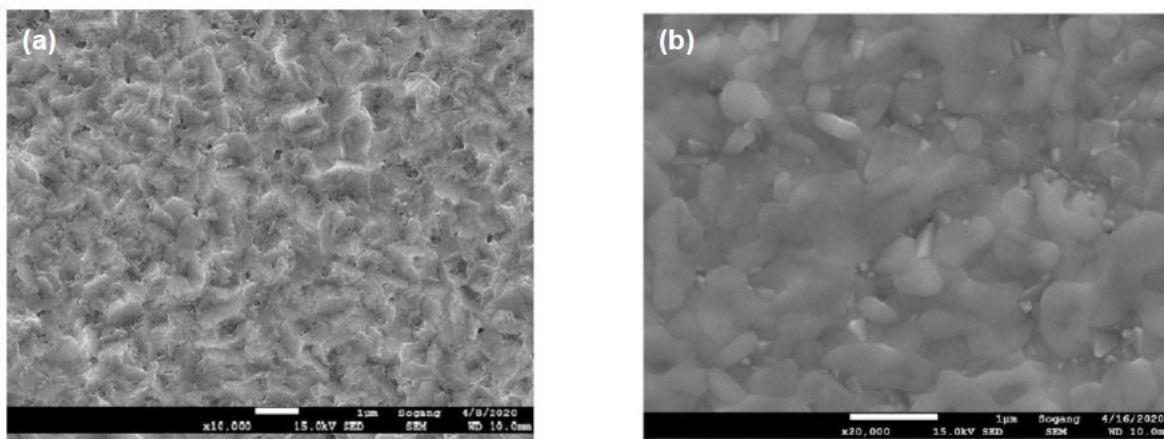

**Figure S1.** Top-view SEM image of the MAPbI<sub>3</sub> layer on a TiO<sub>2</sub>/FTO substrate (a) before and (b) after reaction with MAC vapors.

**X-ray crystallography.** A single crystal of 3-nitrobenzylidene methanamine was selected by a nylon loop (Hampton Research Co.) placed on a handmade cooper plate, which was placed inside a liquid N<sub>2</sub> Dewar vessel at approximately -40 °C and was mounted on a goniometer head in a N<sub>2</sub> cryostream. Data collections were carried out in a Bruker SMART AXS diffractometer equipped with a monochromator with a Mo K $\alpha$  ( $\lambda = 0.71073$  Å) incident beam. The charge-coupled device (CCD) data were integrated and scaled using the Bruker-SAINT software package, and the structure was solved and refined using SHELXTL V 6.12.<sup>1</sup> Hydrogen atoms were located in the calculated positions. The crystal data for 3-nitrobenzylidene methanamine: C<sub>8</sub>H<sub>8</sub>N<sub>2</sub>O<sub>2</sub>, Monoclinic,  $P12_1/c1$ ,  $Z = 8$ ,  $a = 7.4527(2)$ ,  $b = 18.3181(4)$ ,  $c = 11.3999(2)$  Å,  $\alpha = 90$ ,  $\beta = 90.869$ ,  $\gamma = 90^\circ$ ,  $V = 1556.13$  (6) Å<sup>3</sup>,  $\mu = 0.103$  mm<sup>-1</sup>,  $\rho_{\text{calcd}} = 1.401$  g/cm<sup>3</sup>,  $R_1 = 0.0379$ , and  $wR_2 = 0.1055$  for 3852 unique reflections and 219 variables. The crystallographic data for methyl 3-nitrobenzylidene methanamine are listed in Table S3, and Table S4 lists the selected bond distances and angles. CCDC-2023500 for 3-nitrobenzylidene methanamine contains the supplementary crystallographic data for this paper. These data can be obtained free of

charge via [www.ccdc.cam.ac.uk/data\\_request/cif](http://www.ccdc.cam.ac.uk/data_request/cif) (or from the Cambridge Crystallographic Data Centre, 12, Union Road, Cambridge CB2 1EZ, UK; fax: (+44) 1223-336-033; or [deposit@ccdc.cam.ac.uk](mailto:deposit@ccdc.cam.ac.uk)).

**Table S3.** Crystal data for 3-nitrobenzylidene methanamine.

|                                            |                                                             |
|--------------------------------------------|-------------------------------------------------------------|
| Empirical formula                          | C <sub>8</sub> H <sub>8</sub> N <sub>2</sub> O <sub>2</sub> |
| Formula weight                             | 164.16                                                      |
| Temperature (K)                            | 100(2)                                                      |
| Wavelength (Å)                             | 0.71073                                                     |
| Crystal system/space group                 | Monoclinic, <i>P1 2<sub>1</sub>/c1</i>                      |
| Unit cell dimensions                       |                                                             |
| <i>a</i> (Å)                               | 7.4527(2)                                                   |
| <i>b</i> (Å)                               | 18.3181(4)                                                  |
| <i>c</i> (Å)                               | 11.3999(2)                                                  |
| <i>α</i> (°)                               | 90                                                          |
| <i>β</i> (°)                               | 90.869 (1)                                                  |
| <i>γ</i> (°)                               | 90                                                          |
| Volume (Å <sup>3</sup> )                   | 1556.13(6)                                                  |
| <i>Z</i>                                   | 8                                                           |
| Calculated density (g/cm <sup>-3</sup> )   | 1.401                                                       |
| Absorption coefficient (mm <sup>-1</sup> ) | 0.103                                                       |
| Reflections collected                      | 12394                                                       |
| Independent reflections [ <i>R</i> (int)]  | 3091 [0.0379]                                               |
| Refinement method                          | Full-matrix<br>least-squares on <i>F</i> <sup>2</sup>       |
| Data/restraints/parameters                 | 3091/1/219                                                  |
| Goodness-of-fit on <i>F</i> <sup>2</sup>   | 1.014                                                       |

**Table S4.** Selected bond distances (Å) and bond angles (°) for 3-nitrobenzylidene methanamine.

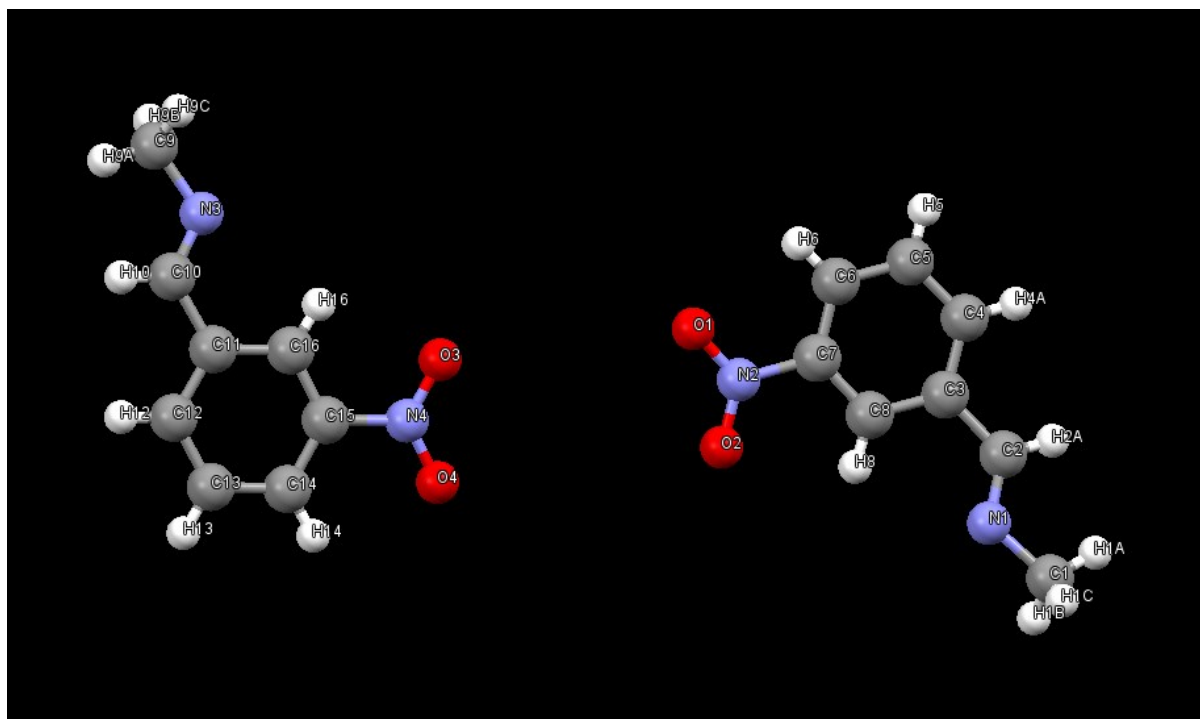

| Number | Object1 | Object2 | Length   |
|--------|---------|---------|----------|
| 1      | N2      | O2      | 1.227(1) |
| 2      | N2      | O1      | 1.233(1) |
| 3      | N2      | C7      | 1.468(1) |
| 4      | C7      | C6      | 1.387(2) |
| 5      | C6      | H6      | 0.951    |
| 6      | C6      | C5      | 1.382(2) |
| 7      | C5      | H5      | 0.95     |
| 8      | C5      | C4      | 1.394(2) |
| 9      | C4      | H4A     | 0.95     |
| 10     | C4      | C3      | 1.394(2) |
| 11     | C3      | C8      | 1.400(2) |
| 12     | C8      | H8      | 0.949    |
| 13     | C4      | H4A     | 0.95     |
| 14     | C3      | C2      | 1.476(2) |
| 15     | C2      | H2A     | 0.949    |
| 16     | C2      | N1      | 1.261(1) |
| 17     | N1      | C1      | 1.457(1) |
| 18     | N1      | C1      | 1.457(1) |

|    |     |    |      |
|----|-----|----|------|
| 19 | H1C | C1 | 0.98 |
| 20 | H1A | C1 | 0.98 |
| 21 | H1B | C1 | 0.98 |

| Number | Atom1 | Atom2 | Atom3 | Angle     |
|--------|-------|-------|-------|-----------|
| 1      | O2    | N2    | O1    | 123.29(9) |
| 2      | O2    | N2    | C7    | 118.75(9) |
| 3      | O1    | N2    | C7    | 117.96(9) |
| 4      | C2    | N1    | C1    | 118.1(1)  |
| 5      | H4A   | C4    | C3    | 119.7     |
| 6      | H4A   | C4    | C5    | 119.7     |
| 7      | C3    | C4    | C5    | 120.6(1)  |
| 8      | H8    | C8    | C3    | 120.8     |
| 9      | H8    | C8    | C7    | 120.7     |
| 10     | C3    | C8    | C7    | 118.54(9) |
| 11     | N1    | C2    | H2A   | 119.2     |
| 12     | N1    | C2    | C3    | 121.6(1)  |
| 13     | H2A   | C2    | C3    | 119.2     |
| 14     | C4    | C3    | C8    | 119.4(1)  |
| 15     | C4    | C3    | C2    | 120.96(9) |
| 16     | C8    | C3    | C2    | 119.64(9) |
| 17     | N2    | C7    | C8    | 118.24(9) |
| 18     | N2    | C7    | C6    | 118.94(9) |
| 19     | C8    | C7    | C6    | 122.8(1)  |
| 20     | C7    | C6    | H6    | 120.8     |
| 21     | C7    | C6    | C5    | 118.3(1)  |
| 22     | H6    | C6    | C5    | 120.9     |
| 23     | C4    | C5    | C6    | 120.4(1)  |
| 24     | C4    | C5    | H5    | 119.9     |
| 25     | C6    | C5    | H5    | 119.8     |
| 26     | N1    | C1    | H1A   | 109.5     |
| 27     | N1    | C1    | H1B   | 109.4     |
| 28     | N1    | C1    | H1C   | 109.5     |
| 29     | H1A   | C1    | H1B   | 109.5     |
| 30     | H1A   | C1    | H1C   | 109.5     |
| 31     | H1B   | C1    | H1C   | 109.5     |
| 32     | C10   | N3    | C9    | 117.43(9) |



|    |     |     |     |           |
|----|-----|-----|-----|-----------|
| 33 | O3  | N4  | O4  | 123.47(9) |
| 34 | O3  | N4  | C15 | 118.40(9) |
| 35 | O4  | N4  | C15 | 118.13(9) |
| 36 | N4  | C15 | C16 | 117.99(9) |
| 37 | N4  | C15 | C14 | 118.83(9) |
| 38 | C16 | C15 | C14 | 123.2(1)  |
| 39 | C12 | C11 | C16 | 119.4(1)  |
| 40 | C12 | C11 | C10 | 119.7(1)  |
| 41 | C16 | C11 | C10 | 120.8(1)  |
| 42 | C11 | C12 | H12 | 119.6     |
| 43 | C11 | C12 | C13 | 120.8(1)  |
| 44 | H12 | C12 | C13 | 119.6     |
| 45 | C15 | C16 | C11 | 118.4(1)  |
| 46 | C15 | C16 | H16 | 120.8     |
| 47 | C11 | C16 | H16 | 120.9     |
| 48 | C15 | C14 | H14 | 121       |
| 49 | C15 | C14 | C13 | 117.9(1)  |
| 50 | H14 | C14 | C13 | 121       |
| 51 | N3  | C10 | C11 | 122.6(1)  |
| 52 | N3  | C10 | H10 | 118.7     |
| 53 | C11 | C10 | H10 | 118.7     |
| 54 | C12 | C13 | C14 | 120.3(1)  |
| 55 | C12 | C13 | H13 | 119.8     |
| 56 | C14 | C13 | H13 | 119.9     |
| 57 | N3  | C9  | H9A | 109.4     |
| 58 | N3  | C9  | H9B | 109.5     |
| 59 | N3  | C9  | H9C | 109.5     |
| 60 | H9A | C9  | H9B | 109.5     |
| 61 | H9A | C9  | H9C | 109.5     |
| 62 | H9B | C9  | H9C | 109.5     |

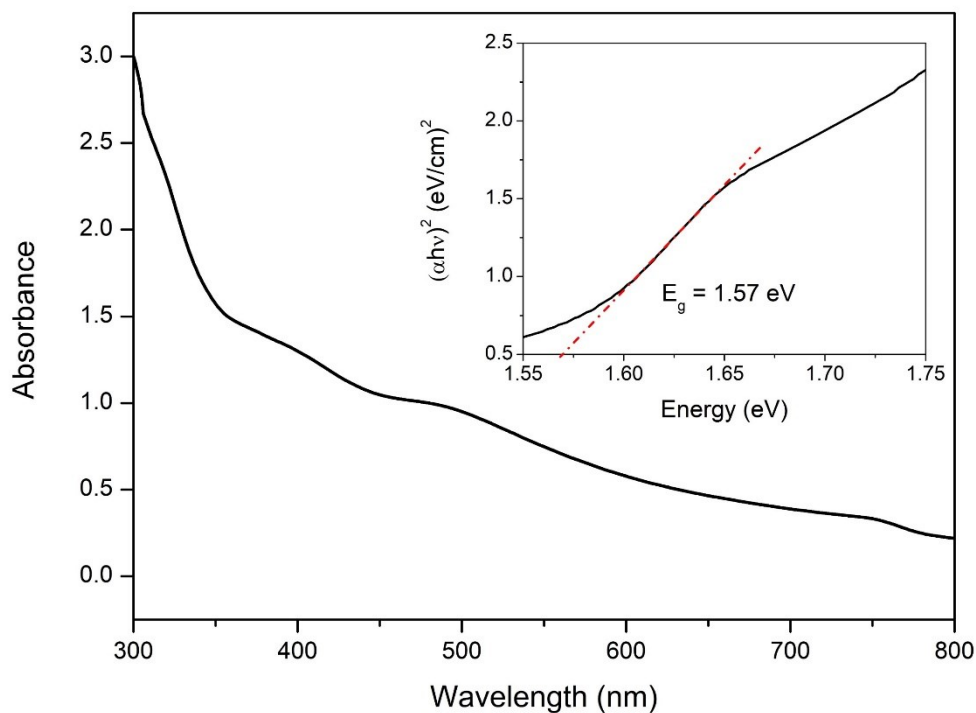

**Figure S2.** UV-visible spectra of MAPbI<sub>3</sub> film grown on a TiO<sub>2</sub>/FTO substrate. The inset shows a Tauc plot of optical absorption coefficient versus photon energy for the MAPbI<sub>3</sub> film.

### Characterization data for imines

#### (E)-N-benzylidenemethanamine (Entry 1).<sup>2</sup>

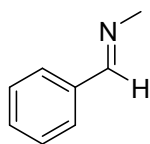

Yield/purity (1.06 g, 98 />99%). Elemental analysis (Found: C, 80.63; H, 7.61; N, 11.75.

Calc. For C<sub>8</sub>H<sub>9</sub>N: C, 80.69; H, 7.54; N, 11.66%).  $\lambda_{\max}(\text{CHCl}_3)/\text{nm}$  246 ( $\epsilon/\text{dm}^3 \text{ mol}^{-1} \text{ cm}^{-1}$ ;

$2.12 \times 10^4$ ).  $\nu_{\max}(\text{powder})/\text{cm}^{-1}$  1650s and 1580w,  $\nu(\text{C}=\text{C})$  and  $\nu(\text{C}=\text{N})$ .  $\delta_{\text{H}}$  (400 MHz;

CDCl<sub>3</sub>; Me<sub>4</sub>Si) 3.50 (s,  $J = 1.6$  Hz, 3H, N-C-H), 7.39 (m,  $J = 1.6$  Hz, 1H, C3-H, C4-H, C5-

*H*, phenyl), 7.69 (m,  $J=1.6$  Hz, 1H, C2-*H*, C6-*H*, phenyl), 8.25 (s,  $J=1.6$  Hz, 1H, N=C-*H*).  $\delta_C$  (100 MHz; CDCl<sub>3</sub>; Me<sub>4</sub>Si) 48.2 (N-CH<sub>3</sub>), 127.9 (CH-3, CH-5, phenyl), 128.6 (CH-2, CH-6, phenyl), 130.5 (CH-4, phenyl), 136.2 (CH-1, phenyl), 162.6 (N=CH) (see Figure S3 and S4). MS (EI+)  $m/z = 118$  (100), 119, (54), 120 (5).

**(E)-N-(2-methoxybenzylidene)methanamine (Entry 2).**<sup>3</sup>

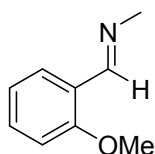

Yield/purity (1.36 g, 98 />99%). Elemental analysis (Found: C, 72.46; H, 7.43; N, 9.39; O, 10.72. Calc. For C<sub>9</sub>H<sub>11</sub>NO: C, 72.43; H, 7.34; N, 9.39; O, 11.01 %).  $\lambda_{\max}(\text{CHCl}_3)/\text{nm}$  250 ( $\epsilon/\text{dm}^3 \text{ mol}^{-1} \text{ cm}^{-1}$ ;  $1.65 \times 10^4$ ) and  $\lambda_{\max}(\text{CHCl}_3)/\text{nm}$  305 ( $\epsilon/\text{dm}^3 \text{ mol}^{-1} \text{ cm}^{-1}$ ;  $7.07 \times 10^3$ ).  $\nu_{\max}(\text{powder})/\text{cm}^{-1}$  1642m - 1599m and 1487m - 1464m  $\nu(\text{C}=\text{C})$  and  $\nu(\text{C}=\text{N})$ .  $\delta_H$  (400 MHz; CDCl<sub>3</sub>; Me<sub>4</sub>Si) 3.50 (s,  $J=1.6$  Hz, 3H, N-CH<sub>3</sub>), 3.83 (s, 3H, O-CH<sub>3</sub>, phenyl), 6.8 (d,  $J=8.4$  Hz, 1H, C3-*H*, phenyl), 6.92 (t,  $J=8.4$  Hz,  $J=1.6$  Hz, 1H, C5-*H*, phenyl), 7.35 (t,  $J=8.4$  Hz,  $J=1.6$  Hz, 1H, C4-*H*, phenyl), 7.9 (d,  $J=8.4$  Hz,  $J=1.6$  Hz, 1H, C6-*H*, phenyl), 8.7 (s,  $J=1.6$  Hz, 1H, N=C-*H*).  $\delta_C$  (100 MHz; CDCl<sub>3</sub>; Me<sub>4</sub>Si) 48.5 (N-CH<sub>3</sub>), 55.4 (N-OCH<sub>3</sub>), 110.9 (CH-3, phenyl), 120.8 (CH-5, phenyl), 124.6 (C<sub>quart</sub>-1, phenyl), 127.0 (CH-6, phenyl), 131.7 (CH-4, phenyl), 158.5 (N=CH) (see Figure S5 and S6). MS (EI+)  $m/z = 148$  (100), 149 (22), 150 (4).

**(E)-N-(4-chlorobenzylidene)methanamine (Entry 3).**<sup>4</sup>

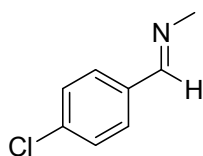

Yield/purity (1.40g, 98/>99%). Elemental analysis (Found: C, 62.55; H, 5.25; Cl, 23.08; N, 9.12. Calc. For C<sub>8</sub>H<sub>8</sub>ClN: C, 62.58; H, 5.25; Cl, 22.96; N, 9.21 %).  $\lambda_{\max}(\text{CHCl}_3)/\text{nm}$  254 ( $\epsilon/\text{dm}^3 \text{ mol}^{-1} \text{ cm}^{-1}$ ;  $2.91 \times 10^4$ ).  $\nu_{\max}(\text{powder})/\text{cm}^{-1}$  1650m - 1596m and 1488m - 1455m,  $\nu(\text{C}=\text{C})$  and  $\nu(\text{C}=\text{N})$ .  $\delta_{\text{H}}$  (400 MHz; CDCl<sub>3</sub>; Me<sub>4</sub>Si) 3.50 (s,  $J = 1.6$  Hz, 3H, N-CH<sub>3</sub>), 7.37 (d,  $J = 8.4$  Hz, 2H, C3-*H* and C5-*H*, phenyl), 7.63 (d,  $J = 8.4$  Hz, 2H, C2-*H* and C6-*H*, phenyl), 8.21 (s,  $J = 1.6$  Hz, 1H, N=C-*H*).  $\delta_{\text{C}}$  (100 MHz; CDCl<sub>3</sub>; Me<sub>4</sub>Si) 48.2 (N-CH<sub>3</sub>), 128.9 (CH-3 and CH-5, phenyl), 129.1 (CH-2 and CH-6, phenyl), 134.7 (C<sub>quart</sub>-1, phenyl), 136.2 (C<sub>quart</sub>-4, phenyl), 161.2 (N=CH-Ph) (see Figure S7 and S8). MS (EI+)  $m/z = 152$  (100), 153 (55), 154 (38), 155 (18), 157 (3).

**(E)-N-(4-bromobenzylidene)methanamine (Entry 4).**<sup>5</sup>

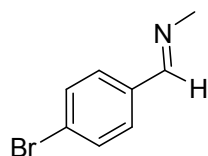

Yield/purity (1.29g, 98/>99%). Elemental analysis (Found: C, 48.51; H, 4.07; N, 7.07; Br, 40.34. Calc. For C<sub>8</sub>H<sub>8</sub>BrN; C, 48.51; H, 4.07; N, 7.06; Br, 40.24 %).  $\lambda_{\max}(\text{CHCl}_3)/\text{nm}$  256 ( $\epsilon/\text{dm}^3 \text{ mol}^{-1} \text{ cm}^{-1}$ ;  $2.36 \times 10^4$ ).  $\nu_{\max}(\text{powder})/\text{cm}^{-1}$  1650s - 1588s and 1487m - 1453m,  $\nu(\text{C}=\text{C})$  and  $\nu(\text{C}=\text{N})$ .  $\delta_{\text{H}}$  (400 MHz; CDCl<sub>3</sub>; Me<sub>4</sub>Si) 3.49 (s,  $J = 1.6$  Hz, 3H, N-CH<sub>3</sub>), 7.52 (d,  $J = 8.4$  Hz, 2H, C2-*H* and C6-*H*, phenyl), 7.56 (d,  $J = 8.4$  Hz, 2H, C3-*H* and C5-*H*, phenyl), 8.21 (s,  $J = 1.6$  Hz, 1H, N=C-*H*).  $\delta_{\text{C}}$  (100 MHz; CDCl<sub>3</sub>; Me<sub>4</sub>Si) 48.3 (N-CH<sub>3</sub>), 124.9 (C<sub>quart</sub>-4, phenyl), 129.4 (CH-2 and CH-6, phenyl), 131.9 (CH-3 and CH-5, phenyl), 135.2 (C<sub>quart</sub>-1, phenyl), 161.3 (N=CH-Ph) (see Figure S9 and S10). MS (EI+)  $m/z = 196$  (100), 197 (57), 198 (100), 199 (54), 200 (4).

**(E)-N-(3-nitrobenzylidene)methanamine (Entry 5).**<sup>6</sup>

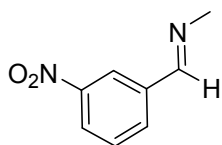

Yield/purity (1.51 g, 97/>99%). mp 54.7 °C – 55 °C (CH<sub>2</sub>Cl<sub>2</sub>/hexane) lit. 55.1-55.8 °C. Elemental analysis (Found: C, 58.53; H, 4.91; N, 17.06; O, 19.49. Calc. For C<sub>8</sub>H<sub>8</sub>N<sub>2</sub>O<sub>2</sub>: C, 58.54; H, 4.92; N, 17.05; O, 19.48 %).  $\lambda_{\max}(\text{CHCl}_3)/\text{nm}$  241 ( $\epsilon/\text{dm}^3 \text{ mol}^{-1} \text{ cm}^{-1}$ ;  $2.53 \times 10^4$ ).  $\nu_{\max}(\text{powder})/\text{cm}^{-1}$  1648m and 1520s,  $\nu(\text{C}=\text{C})$  and  $\nu(\text{C}=\text{N})$ .  $\delta_{\text{H}}$  (400 MHz; CDCl<sub>3</sub>; Me<sub>4</sub>Si) 3.57 (s,  $J=1.6$  Hz, 3H, N-CH<sub>3</sub>), 7.58 (t,  $J=8.0$  Hz, 1H, C5-H, phenyl), 8.04 (d,  $J=8.0$  Hz, 1H, C4-H, phenyl), 8.24 (d,  $J=8.0$  Hz, 1H, C6-H, phenyl), 8.36 (s,  $J=1.6$  Hz, 1H, C2-H, phenyl), 8.53 (s,  $J=1.6$  Hz, 1H, N=C-H).  $\delta_{\text{C}}$  (100 MHz; CDCl<sub>3</sub>; Me<sub>4</sub>Si) 48.2 (N-CH<sub>3</sub>), 122.5 (CH-2, phenyl) 124.9 (CH-4, phenyl), 129.6 (CH-5, phenyl), 133.4 (CH-6, phenyl), 137.9 (C<sub>quart</sub>-1, phenyl), 148.5 (C-NO<sub>2</sub>), 159.9 (N=CH-Ph). (see Figure S11 and S12). MS (EI+)  $m/z = 163$  (100), 164 (75), 165 (7).

### 2-[(E)-(methylimino)methyl]phenol (Entry 6).<sup>7</sup>

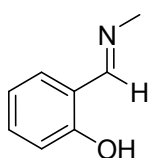

Yield/purity (1.20 g, 98/>99%). Elemental analysis (Found: C, 71.09; H, 6.71; N, 10.36; O, 11.84. Calc. For C<sub>8</sub>H<sub>9</sub>NO: C, 71.14; H, 6.68; N, 10.41; O, 11.76%).  $\lambda_{\max}(\text{CHCl}_3)/\text{nm}$  255 ( $\epsilon/\text{dm}^3 \text{ mol}^{-1} \text{ cm}^{-1}$ ;  $9.0 \times 10^3$ ) and  $\lambda_{\max}(\text{CHCl}_3)/\text{nm}$  315 ( $\epsilon/\text{dm}^3 \text{ mol}^{-1} \text{ cm}^{-1}$ ;  $3.47 \times 10^3$ ).  $\nu_{\max}(\text{powder})/\text{cm}^{-1}$  1635s - 1583m and 1495m – 1451m,  $\nu(\text{C}=\text{C})$  and  $\nu(\text{C}=\text{N})$ . 3.45 (s,  $J=1.6$  Hz, 3H, N-CH<sub>3</sub>), 6.85 (t,  $J=7.6$  Hz, 1H, C5-H, phenyl), 6.96 (d,  $J=8.0$  Hz, 1H, C3-H, phenyl), 7.21 (d,  $J=7.6$  Hz, 1H, C6-H, phenyl), 7.27 (t,  $J=8.0$  Hz, 1H, C4-H, phenyl), 8.30 (s,  $J=1.6$  Hz, 1H, N=C-H). 13.5 (s, -OH, exchangeable signal)  $\delta_{\text{C}}$  (100 MHz;

CDCl<sub>3</sub>; Me<sub>4</sub>Si) 46.0 (N-CH<sub>3</sub>), 117.0 (CH-3, phenyl) 118.5 (CH-5, phenyl), 118.9 (CH-1, phenyl), 131.1 (CH-6, phenyl), 132.1 (CH-4, phenyl), 161.2 (C-OH, phenyl), 166.2 (N=CH-Ph). (see Figure S13 and S14). MS (EI+)  $m/z$  = 134 (89), 135 (100), 136 (9).

**(E)-N-((E)-3-phenylallylidene)methanamine (Entry 7).**

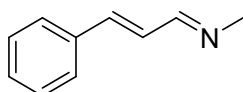

Yield/purity (1.32 g, 98/>99%). Elemental analysis (Found: C, 82.72; H, 7.64; N, 9.65. Calc. For C<sub>10</sub>H<sub>11</sub>N: C, 82.66; H, 7.72; N, 9.65 %).  $\lambda_{\max}$ (CHCl<sub>3</sub>)/nm 281 ( $\epsilon$ /dm<sup>3</sup> mol<sup>-1</sup> cm<sup>-1</sup>; 2.67x10<sup>4</sup>).  $\nu_{\max}$ (powder)/cm<sup>-1</sup> 1637s and 1448m,  $\nu$ (C=C) and  $\nu$ (C=N).  $\delta_{\text{H}}$  (500 MHz; CDCl<sub>3</sub>; Me<sub>4</sub>Si) 3.41 (s, 3H, N-C-H), 6.87 (dd,  $J$  = 16 Hz, 1H, Ph-CH=CH<sub>b</sub>-CH=N-CH<sub>3</sub>), 6.92 (d,  $J$  = 16 Hz, 1H, Ph-CH<sub>c</sub>=CH-CH=N-CH<sub>3</sub>), 7.30 (t,  $J$  = 7.5 Hz, 1H, C4-H, phenyl), 7.35 (t,  $J$  = 7.5 Hz, 2H, C3-H and C5-H, phenyl), 7.46 (d,  $J$  = 7.5 Hz, 2H, 2H, C2-H and C6-H, phenyl), 8.0 (dd,  $J$  = 7.5 Hz and  $J$  = 1.5 Hz, 1H, Ph-CH=CH-CH<sub>a</sub>=N-CH<sub>3</sub>).  $\delta_{\text{C}}$  (100 MHz; CDCl<sub>3</sub>; Me<sub>4</sub>Si) 48.2 (N-CH<sub>3</sub>), 127.1 (Ph-CH=CH<sub>b</sub>-CH=N-CH<sub>3</sub>, phenyl), 128.1 (CH-2 and CH-6, phenyl), 128.7 (CH-3 and CH-5, phenyl), 129.0 (CH-4, phenyl), 135.7 (CH-1, phenyl), 141.0 (Ph-CH<sub>c</sub>=CH-CH=N-CH<sub>3</sub>), 164.0 (Ph-CH=CH-CH<sub>a</sub>=N-CH<sub>3</sub>). (see Figure S15 and S16). MS (EI+)  $m/z$  = 144 (100), 145 (22), 146 (2).

**(E)-N-((E)-3-(2-methoxyphenyl)allylidene)methanamine (Entry 8).**

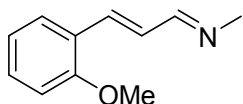

ield/purity (1.62 g, 98/>99%). Elemental analysis (Found: C, 75.40; H, 7.48; N, 7.99; O, 9.13. Calc. For C<sub>11</sub>H<sub>13</sub>NO: C, 75.49; H, 7.46; N, 7.99; O, 9.04 %).  $\lambda_{\max}$ (CHCl<sub>3</sub>)/nm 277

( $\epsilon/\text{dm}^3 \text{ mol}^{-1} \text{ cm}^{-1}$ ;  $2.19 \times 10^4$ ) and  $\lambda_{\text{max}}(\text{CHCl}_3)/\text{nm}$  318 ( $\epsilon/\text{dm}^3 \text{ mol}^{-1} \text{ cm}^{-1}$ ;  $1.32 \times 10^4$ ).  $\nu_{\text{max}}(\text{powder})/\text{cm}^{-1}$  1634m and 1487m,  $\nu(\text{C}=\text{C})$  and  $\nu(\text{C}=\text{N})$ .  $\delta_{\text{H}}$  (500 MHz;  $\text{CDCl}_3$ ;  $\text{Me}_4\text{Si}$ ) 3.40 (s, 3H, N-C-H), 3.85 (s, 3H, C2-OCH<sub>3</sub>, phenyl), 6.89 (t,  $J = 7.5$  Hz, 1H, C5-H, phenyl), 6.91 (dd,  $J = 16$  Hz, 1H, Ph-CH=CH<sub>b</sub>-CH=N-CH<sub>3</sub>), 6.94 (t,  $J = 7.5$  Hz, 1H, C4-H, phenyl), 7.27 (d,  $J = 16$  Hz, 1H, Ph-CH<sub>c</sub>=CH-CH=N-CH<sub>3</sub>), 7.29 (d,  $J = 7.5$  Hz, 1H, C3-H, phenyl), 7.50 (d,  $J = 7.5$  Hz, 1H, C3-H, phenyl), 8.02 (dd,  $J = 7.5$  Hz and  $J = 1.5$  Hz, 1H, Ph-CH=CH-CH<sub>a</sub>=N-CH<sub>3</sub>),  $\delta_{\text{C}}$  (100 MHz;  $\text{CDCl}_3$ ;  $\text{Me}_4\text{Si}$ ) 48.1 (N-CH<sub>3</sub>), 55.4 (C2-OCH<sub>3</sub>, phenyl), 110.9 (CH-3, phenyl), 120.7 (Ph-CH=CH<sub>b</sub>-CH=N-CH<sub>3</sub>, phenyl), 124.7 (CH-5, phenyl), 127.4 (CH-1, phenyl), 128.7 (CH-4, phenyl), 130.2 (CH-6, phenyl), 136.2 (Ph-CH<sub>c</sub>=CH-CH=N-CH<sub>3</sub>), 157.2 (CH-2, phenyl), 164.9 (Ph-CH=CH-CH<sub>a</sub>=N-CH<sub>3</sub>). (see Figure S17 and S18). MS (EI+)  $m/z = 174$  (100), 175 (35), 176 (5).

**Figure S3**  $^1\text{H}$  NMR Spectrum of **Entry 1**

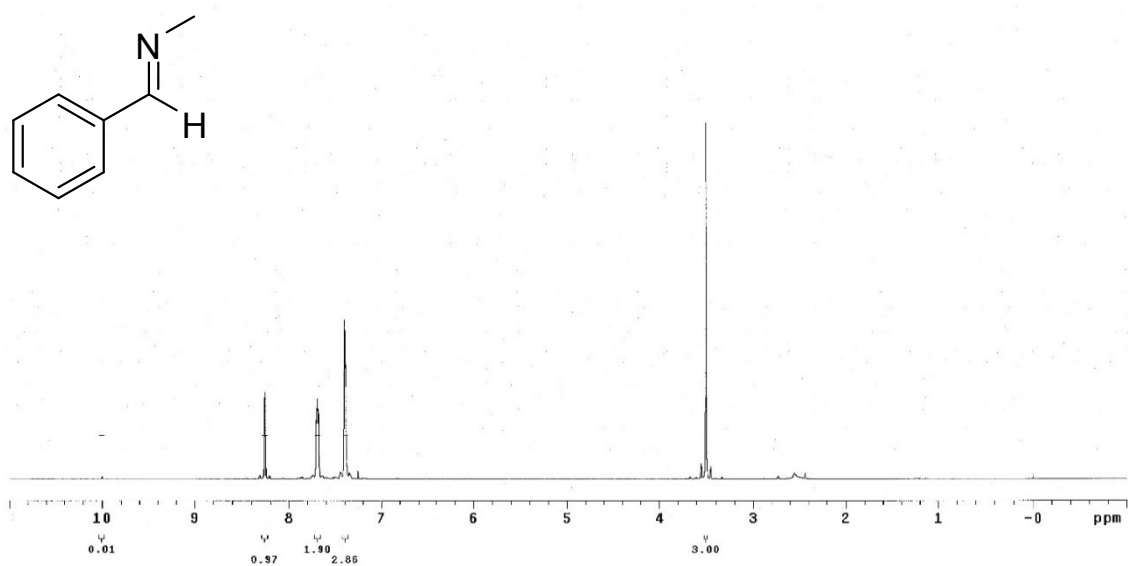

**Figure S4**  $^{13}\text{C}$  NMR Spectrum of **Entry 1**

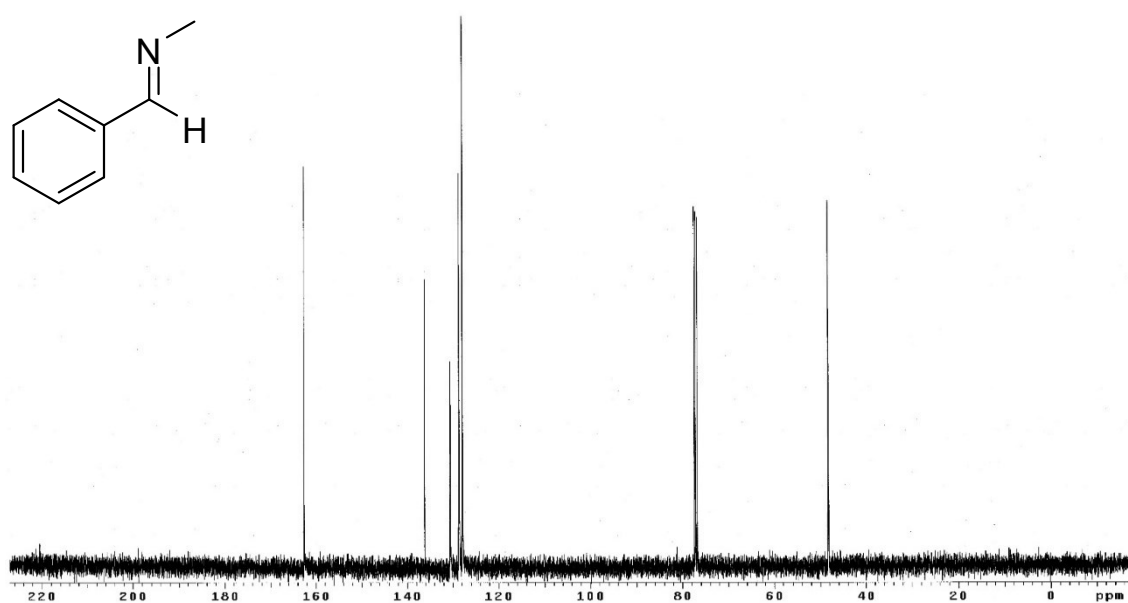



Figure S5  $^1\text{H}$  NMR Spectrum of Entry 2

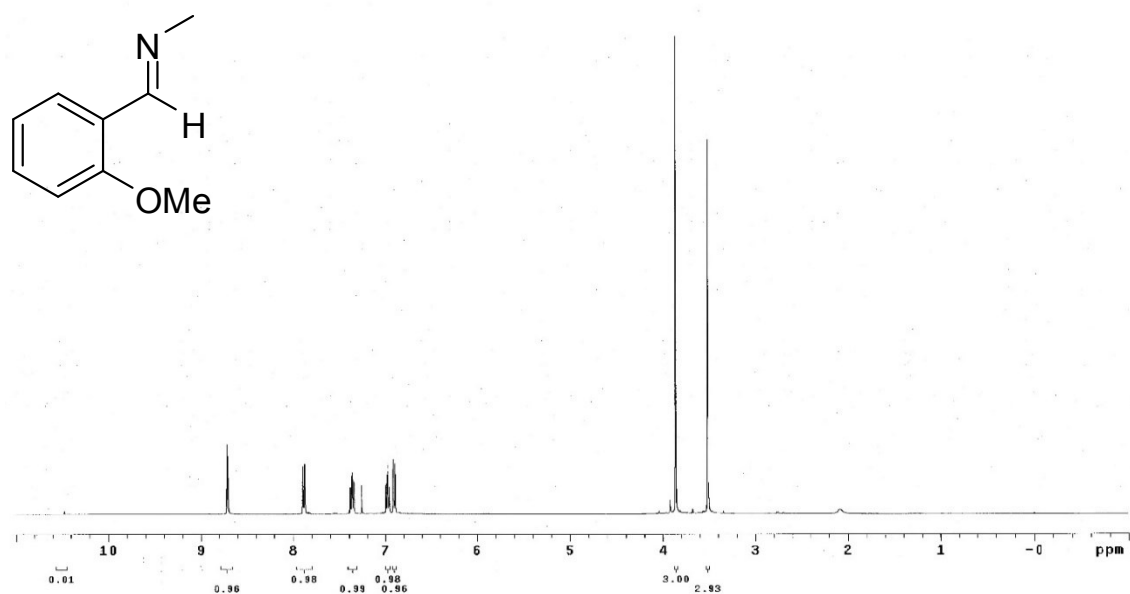

Figure S6  $^{13}\text{C}$  NMR Spectrum of Entry 2

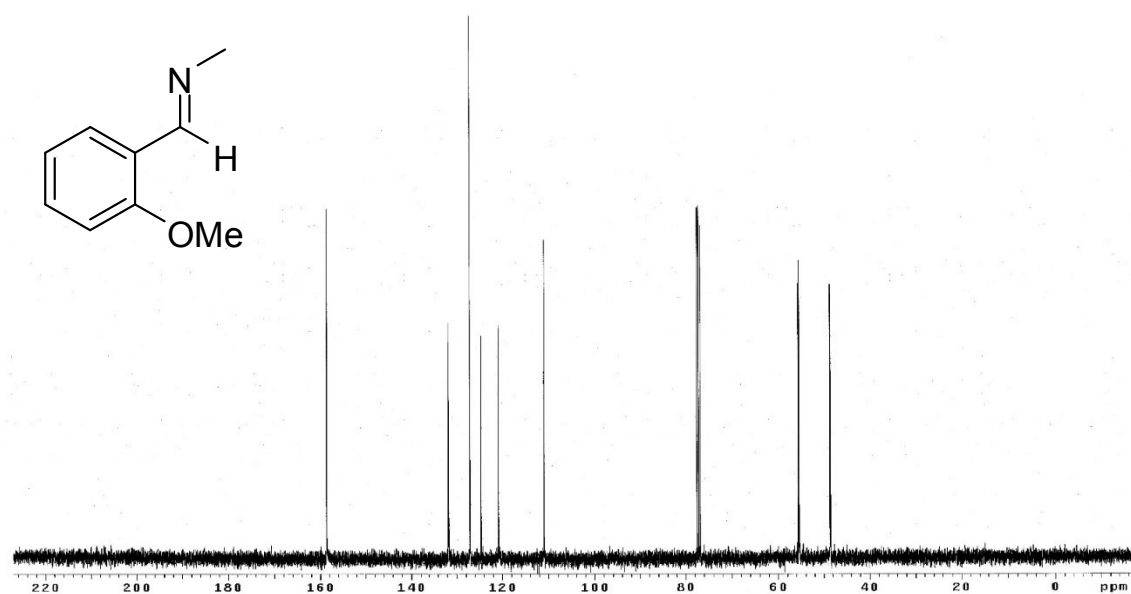

**Figure S7**  $^1\text{H}$  NMR Spectrum of **Entry 3**

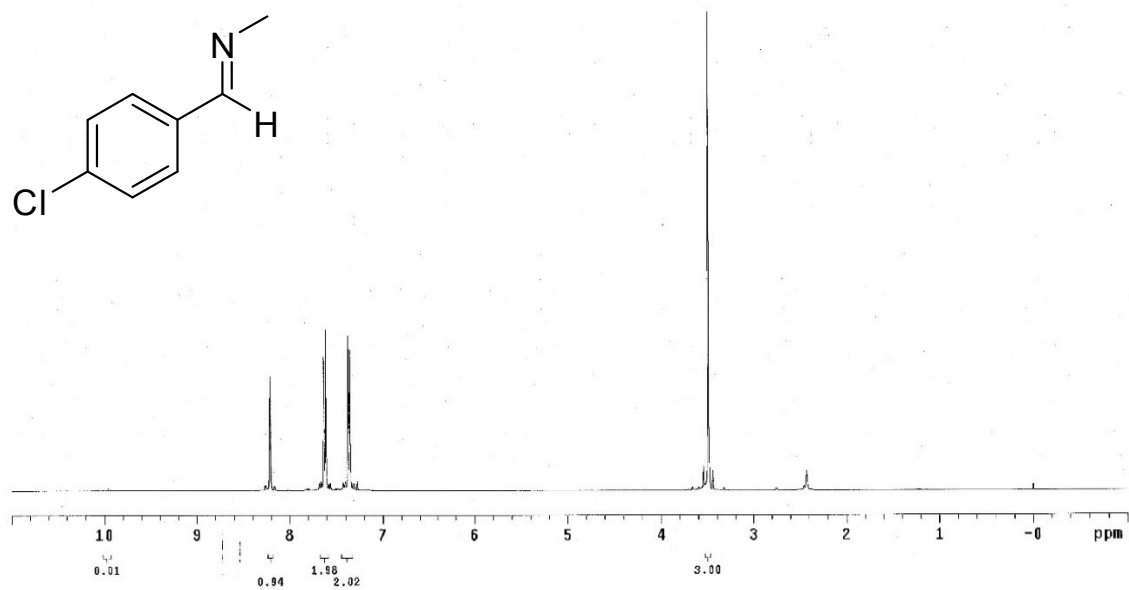

**Figure S8**  $^{13}\text{C}$  NMR Spectrum of **Entry 3**

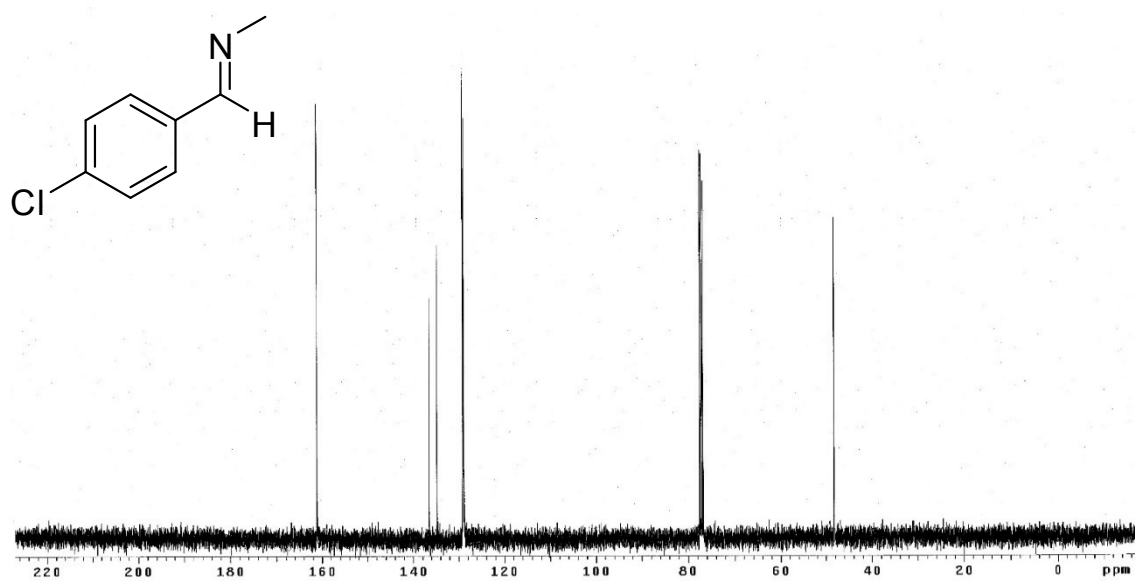

**Figure S9**  $^1\text{H}$  NMR Spectrum of **Entry 4**

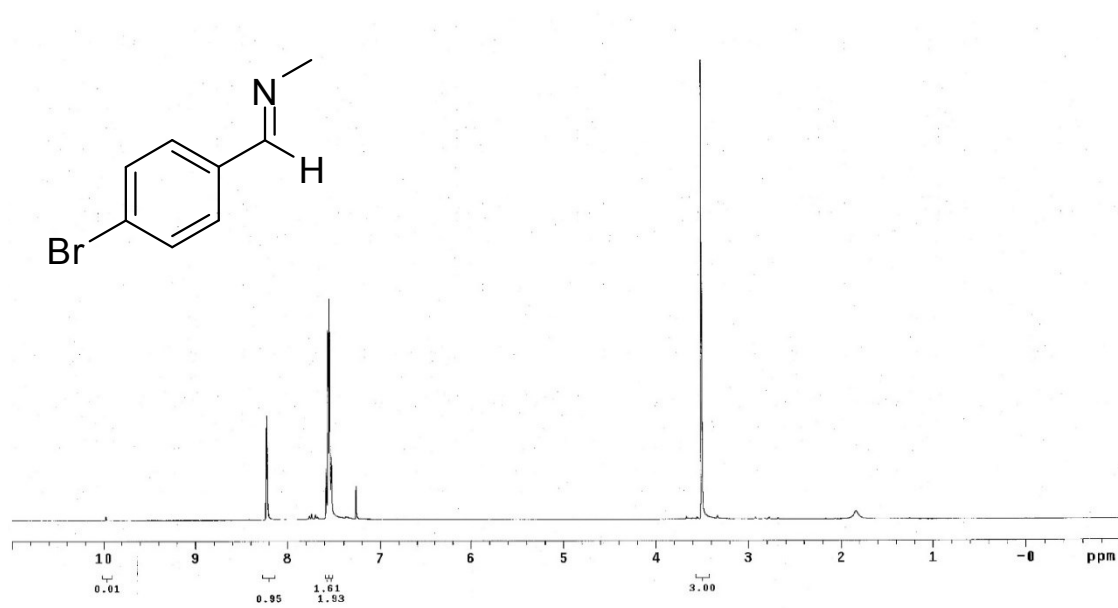

**Figure S10**  $^{13}\text{C}$  NMR Spectrum of **Entry 4**

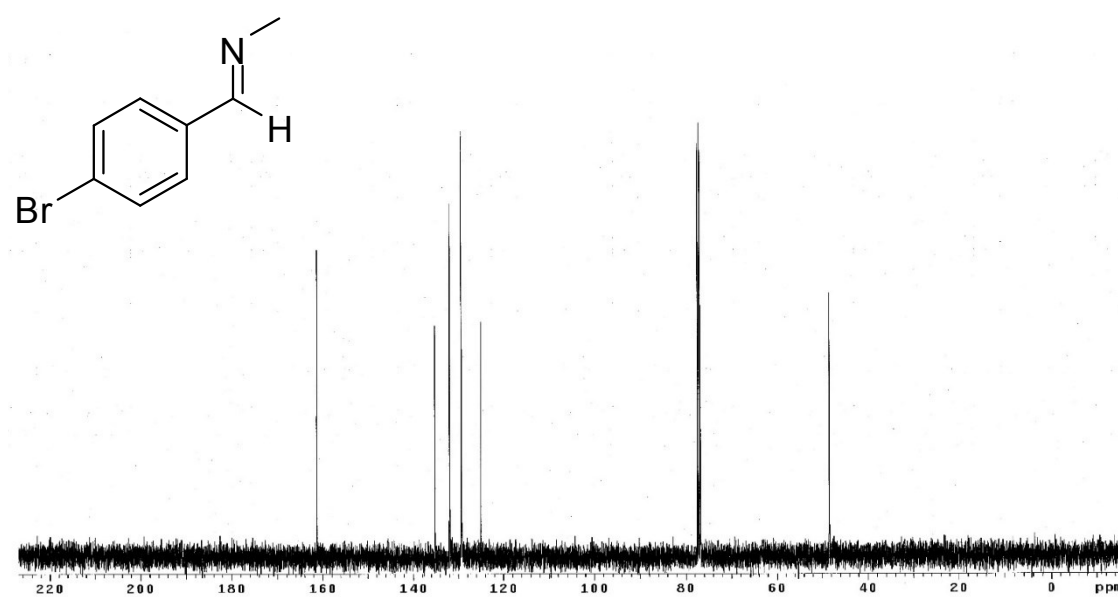

**Figure S11**  $^1\text{H}$  NMR Spectrum of **Entry 5**

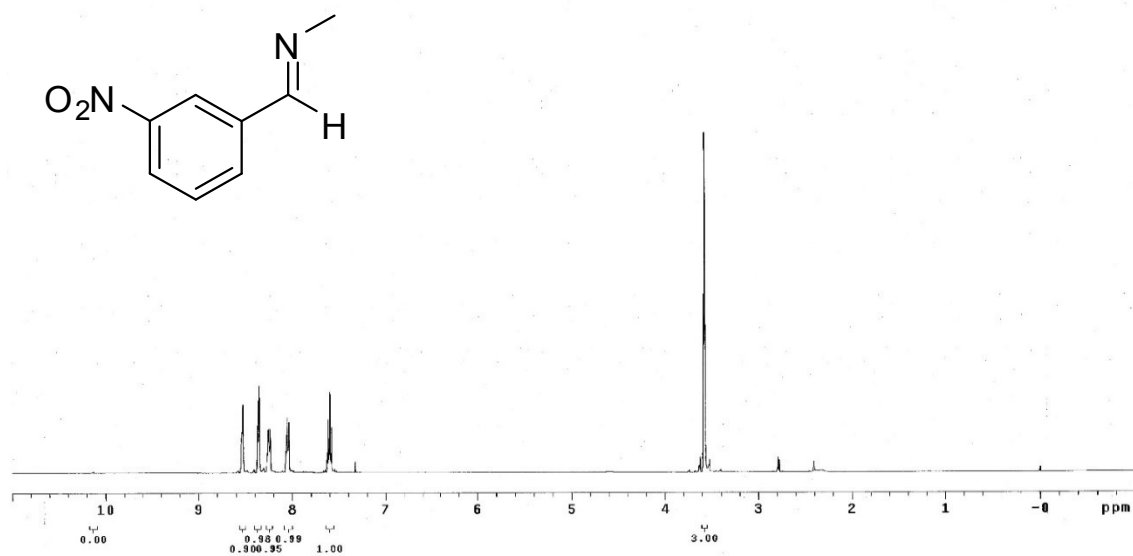

**Figure S12**  $^{13}\text{C}$  NMR Spectrum of **Entry 5**

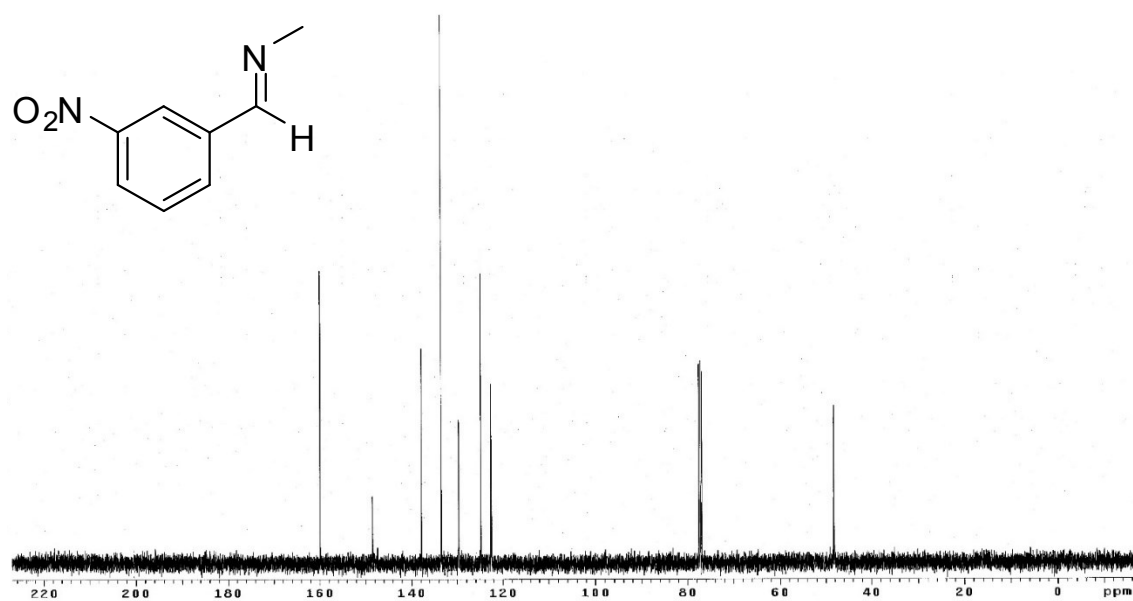

**Figure S13**  $^1\text{H}$  NMR Spectrum of **Entry 6**

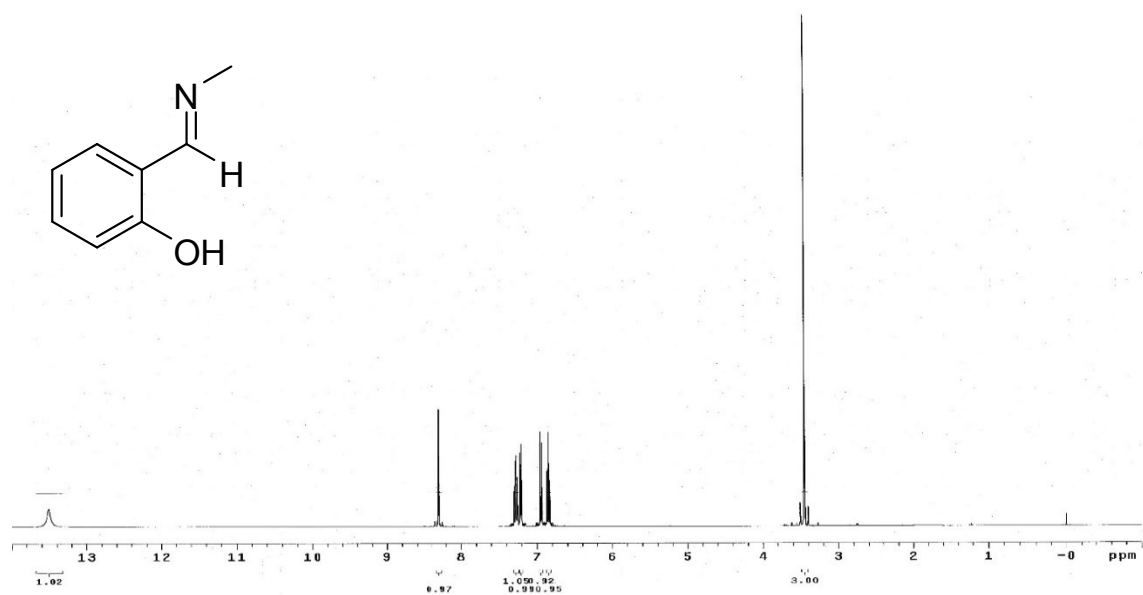

**Figure S14**  $^{13}\text{C}$  NMR Spectrum of **Entry 6**

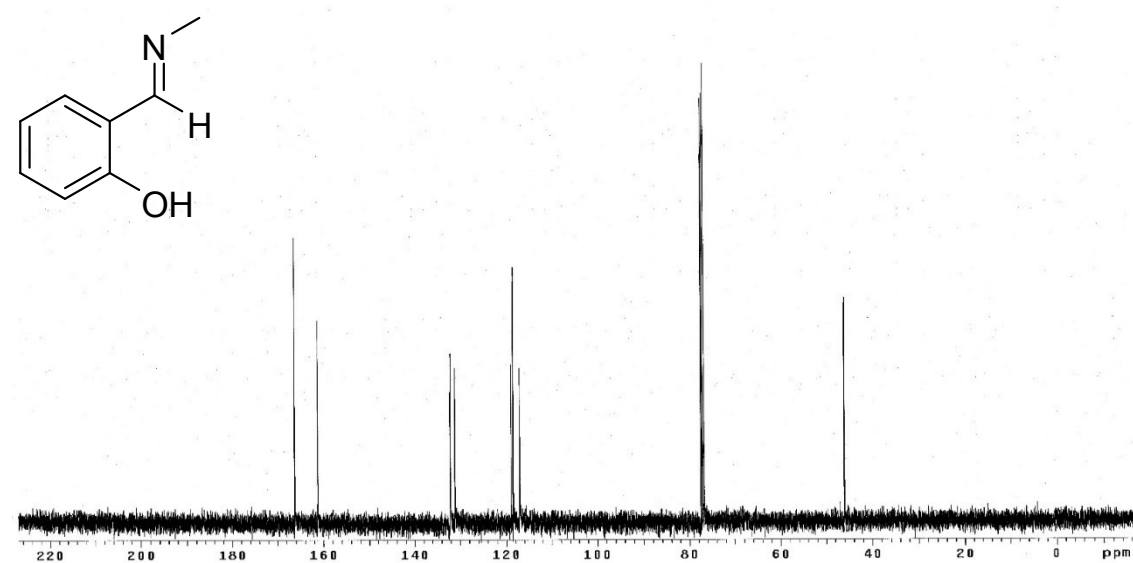

**Figure S15**  $^1\text{H}$  NMR Spectrum of **Entry 7**

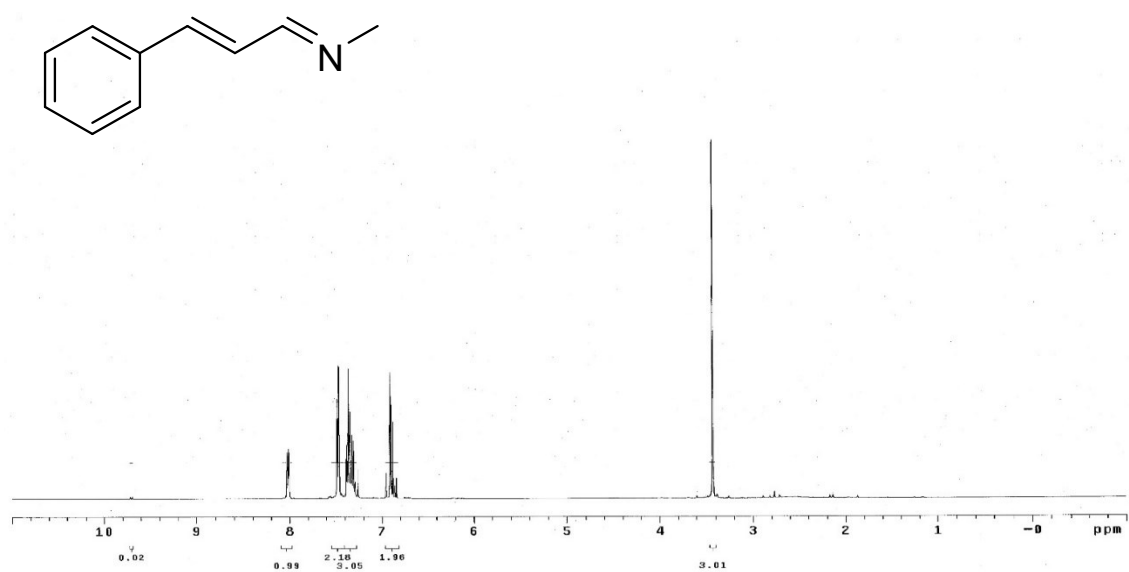

**Figure S16**  $^{13}\text{C}$  NMR Spectrum of **Entry 7**

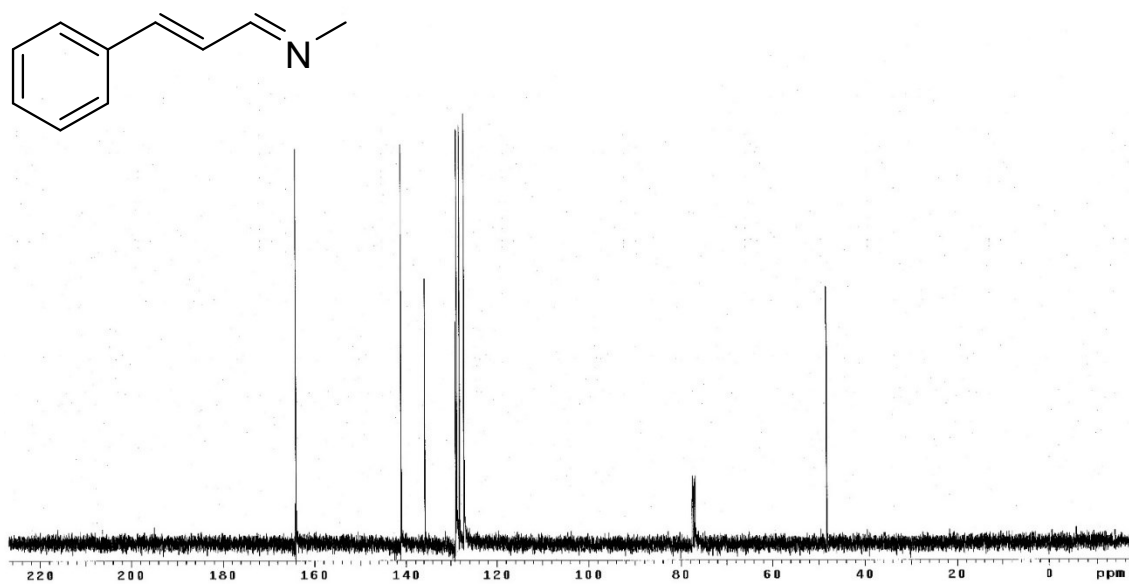

**Figure S17**  $^1\text{H}$  NMR Spectrum of **Entry 8**

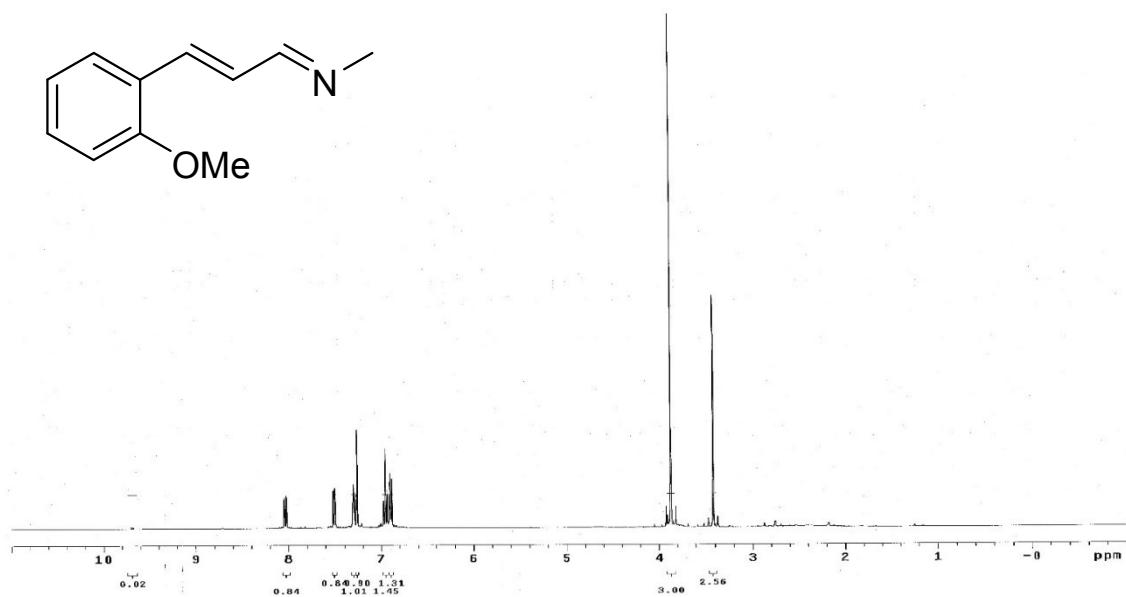

**Figure S18**  $^{13}\text{C}$  NMR Spectrum of **Entry 8**

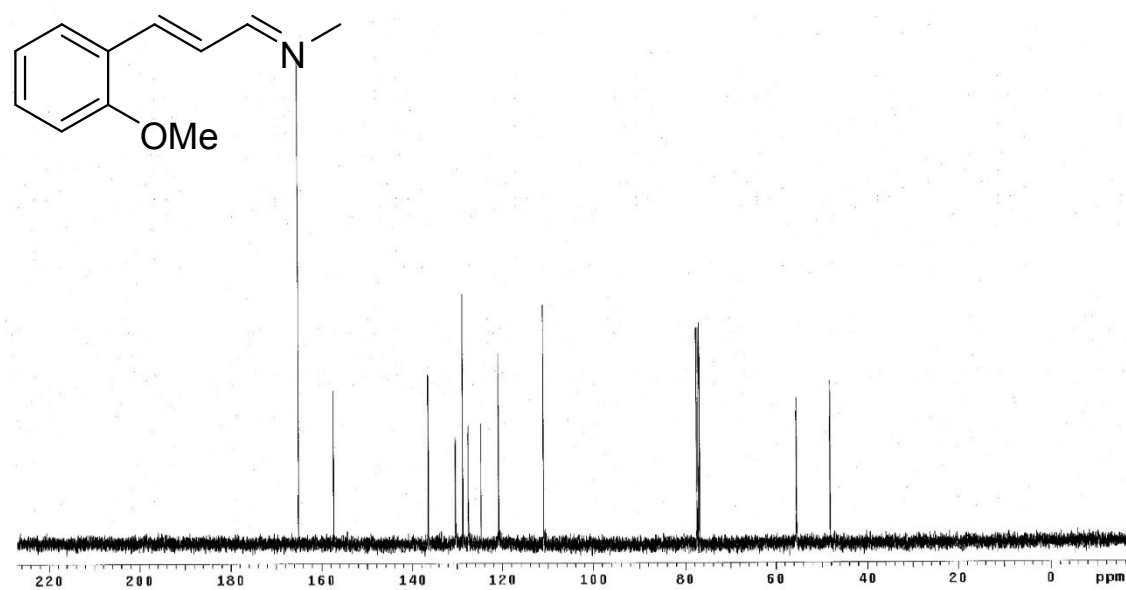

**Figure S19**  $^1\text{H}$  NMR Spectrum of MMA solution (33wt% in EtOH) and **trans-cinnamaldehyde**.

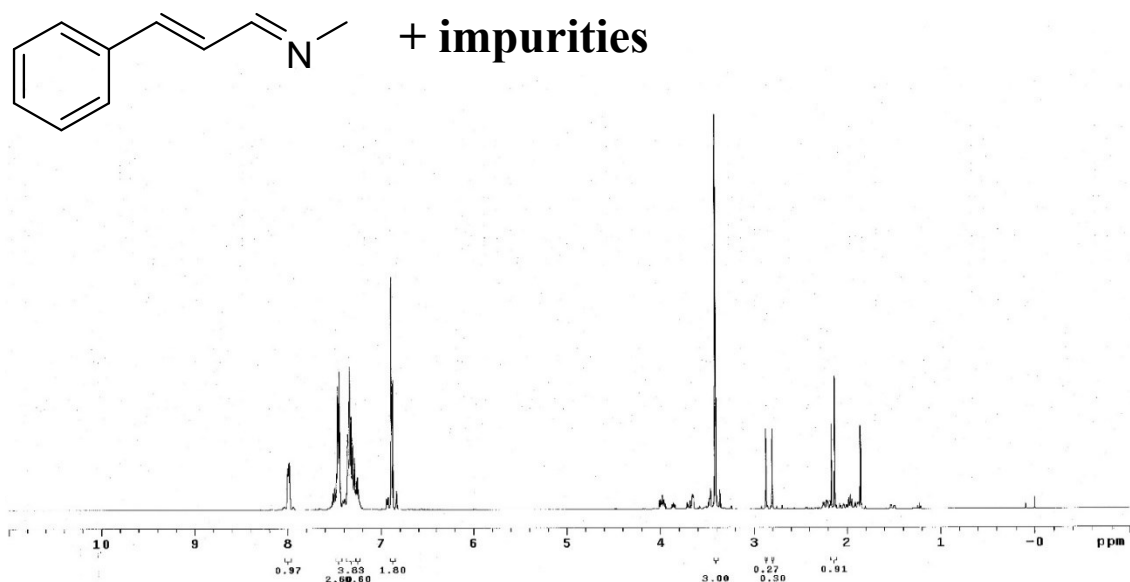

**Figure S20**  $^{13}\text{C}$  NMR Spectrum of MMA solution (33wt% in EtOH) and **trans-cinnamaldehyde**.

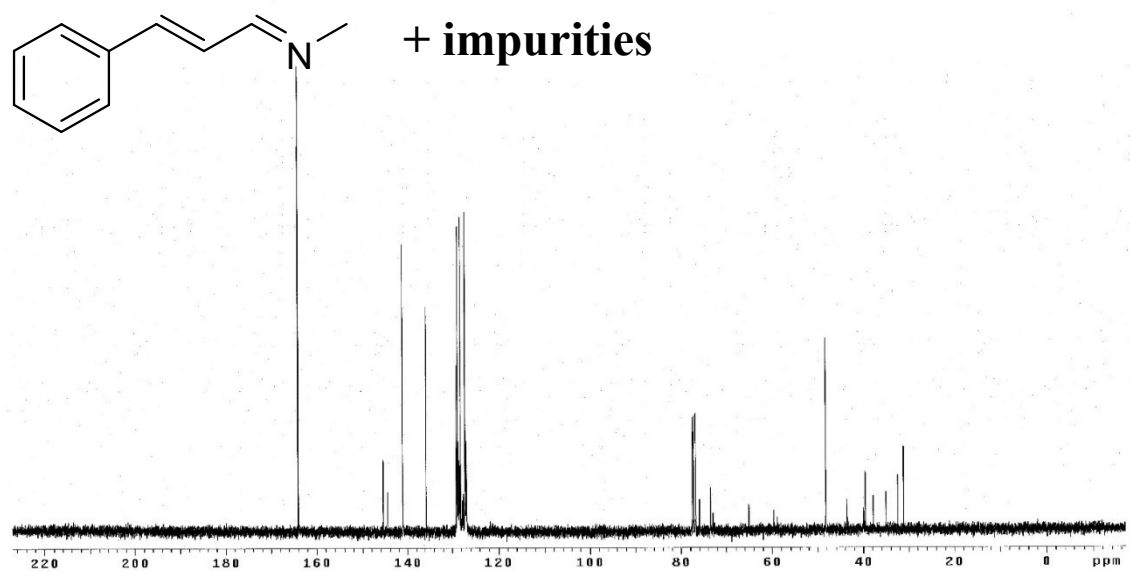



## References

1. G. M. Sheldrick, *SHELXTL/PC Version 6.12 for Windows XP*, Bruker AXS Inc., Madison, WI, 2001.
2. W. Schilf / Journal of Molecular Structure 689 (2004) 245–249, L. Paquin, J. Hamelin, F. Texier-Boulet, *Synthesis*, **2006**, 1652-1656, Compare to a commercial product: CAS number 622-29-7.
3. L. Piazzzi et al. / Bioorg. Med. Chem. 15 (2007) 575–585. Compare to a commercial product: CAS number. 1125-90-2.
4. L. Paquin, J. Hamelin, F. Texier-Boulet, *Synthesis*, **2006**, 1652-1656. L. Piazzzi et al. / Bioorg. Med. Chem. 15 (2007) 575–585., Jennings, W. B.; Wilson, V. E.; Boyd, D. R.; Coulter, P. B., *Organic Magnetic Resonance* **1983**, 21 (4), 279-286. Compare to a commercial product: CAS number. 13114-22-2.
5. The Journal of Organic Chemistry **2002**, 67 (23), 8191-8196. Jennings, W. B.; Wilson, V. E.; Boyd, D. R.; Coulter, P. B., *Organic Magnetic Resonance* **1983**, 21 (4), 279-286.
6. Connolly, T. J.; Constantinescu, A.; Lane, T. S.; Matchett, M.; McGarry, P.; Paperna, M., *Organic Process Research & Development* **2005**, 9 (6), 837-842. Compare to a commercial product: CAS number. 121004-44-2.
7. W. Schilf / Journal of Molecular Structure 689 (2004) 245–249, *Russian Journal of Coordination Chemistry* **2009**, 35 (2), 120-127. Compare to a commercial product: CAS number. 107910-69-0.
8. Hauser, C. R.; Manyik, R. M.; Brasen, W. R.; Bayless, P. L., The Journal of Organic Chemistry **1955**, 20 (8), 1119-1128. Winn, M.; Dunnigan, D. A.; Zaugg, H. E., The Journal of Organic Chemistry **1968**, 33 (6), 2388-2392., Jennings, W. B.; Wilson, V. E.; Boyd, D. R.; Coulter, P. B., *Organic Magnetic Resonance* **1983**, 21 (4), 279-286. Compare to a commercial product: CAS number. 13280-16-5.
